# Supplementary material
Source: Springer Nature journal article supplement (https://www.springermedizin.de/resource/supplementary/13048_2014_249_MOESM6_ESM.pdf/9665232)
Supplement: MOESM6 [file 9665232]

**s.c. tumors****i.p. tumors****Control****HA-CMC****Control****HA-CMC**

60 kDa

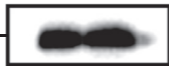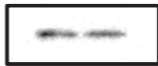**Akt**

43 kDa

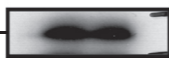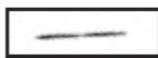**Actin**

60 kDa

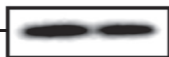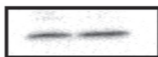**p-Akt**

43 kDa

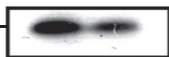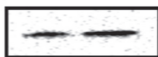**Actin**

44 kDa

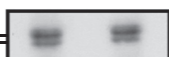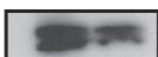**p-ERK**

42

43 kDa

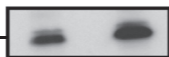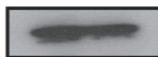**Actin**

165 kDa

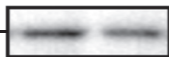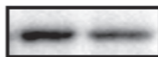**FAK**

43 kDa

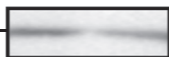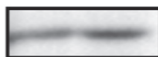**Actin**
